# Supplementary material for: Optimizing orthopedic trauma care delivery during the COVID-19 pandemic. A closed-loop audit of implementing a virtual fracture clinic and fast-track pathway in a Dutch level 2 trauma center
Source: HighWire-hosted journal article supplement (doi:10.1136/tsaco-2021-000691), 2021-10-01
Supplement: tsaco-2021-000691supp001_data_supplement.pdf [file tsaco-2021-000691supp001_data_supplement.pdf]

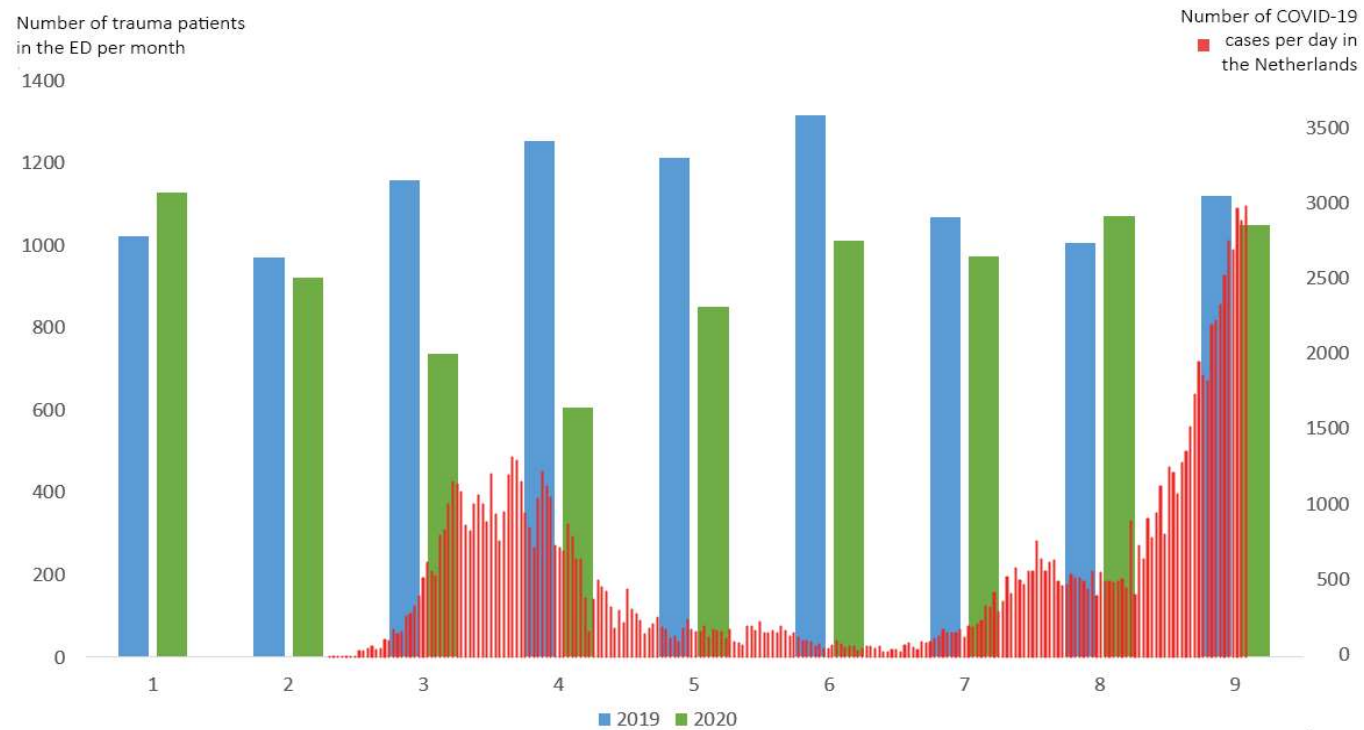

Figure S1 – the number of patients with suspected injuries presenting to our ED in 2019 and 2020 per month, and COVID-19 cases per day in the Netherlands.

Blue bars, number of presentations in 2019; Green bars, number of presentations in 2020; Red bars, number of COVID-19 cases per day; ED, Emergency Department;
