# Supplementary material for: Optimizing orthopedic trauma care delivery during the COVID-19 pandemic. A closed-loop audit of implementing a virtual fracture clinic and fast-track pathway in a Dutch level 2 trauma center
Source: HighWire-hosted journal article supplement (doi:10.1136/tsaco-2021-000691), 2021-10-01
Supplement: tsaco-2021-000691supp002_data_supplement.pdf [file tsaco-2021-000691supp002_data_supplement.pdf]

Table S1 – Recorded timestamps before and during the audit

| Process                                                                                            | Timestamp                           | Comment                                                                                                                                           |
|----------------------------------------------------------------------------------------------------|-------------------------------------|---------------------------------------------------------------------------------------------------------------------------------------------------|
| <b>Total time from arrival until leaving the hospital</b>                                          | Total waiting time                  |                                                                                                                                                   |
| <b>Subprocesses</b>                                                                                |                                     |                                                                                                                                                   |
| Time from arrival in the Emergency Department to first contact with physician                      | Time to review                      | This included registration and triage. After triage the patient takes place in the waiting room until a clinician is ready to review the patient. |
| Time from first contact with physician until decision- making complete, and immobilization started | Time for review and decision-making |                                                                                                                                                   |
| Time from immobilization started until leaving the hospital                                        | Time after review                   |                                                                                                                                                   |
