# Supplementary material for: Optimizing orthopedic trauma care delivery during the COVID-19 pandemic. A closed-loop audit of implementing a virtual fracture clinic and fast-track pathway in a Dutch level 2 trauma center
Source: HighWire-hosted journal article supplement (doi:10.1136/tsaco-2021-000691), 2021-10-01
Supplement: tsaco-2021-000691supp003_data_supplement.pdf [file tsaco-2021-000691supp003_data_supplement.pdf]

Table S2 – Median time spent in the ED during baseline, first audit and second audit period

|                                         | First audit; minutes   |                     |                       | Second audit; minutes     |                       |
|-----------------------------------------|------------------------|---------------------|-----------------------|---------------------------|-----------------------|
|                                         | January 2020 (n = 131) | April 2020 (n = 77) | Significance; p-value | September 2020; (n = 142) | Significance; p-value |
| <b>Total time; median (i.q.r.)</b>      | 131 (96 – 165)         | 95 (64 – 128)       | <0.001                | 98 (73 – 133)             | 0.001                 |
| <b>Subprocesses</b>                     |                        |                     |                       |                           |                       |
| Entering – first contact with physician | 60 (34 – 87)           | 30 (19 – 44)        | <0.001                | 47 (25 – 63)              | <0.001                |
| First contact – start immobilization    | 45 (23 – 80)           | 42 (22 – 70)        | 0.506                 | 35 (20 – 60)              | 0.019                 |
| Start immobilization - leaving          | 11 (4 – 24)            | 10 (6 – 16)         | 0.489                 | 8 (3 – 16)                | 0.34                  |

Mann-Whitney U test was used to compare time measurements of April to January and September to January. i.q.r., interquartile range;
